# Supplementary material for: Proton-transfer salts between an EDT-TTF derivative having imidazole-ring and anilic acids: multi-dimensional networks by acid–base hydrogen-bonds, π-stacks and chalcogen atom interactions
Source: Royal Society of Chemistry journal article supplement (doi:10.1039/c1ce05326d), 2011-01-01
Supplement: c1ce05326d.pdf [file c1ce05326d.pdf]

## Supporting Information

### **Proton-transfer salts between an EDT-TTF derivative having imidazole-ring and anilic acids: Multi-dimensional networks by acid-base hydrogen-bonds, $\pi$ -stacks and chalcogen atom interactions**

Tsuyoshi Murata, Yumi Yakiyama, Kazuhiro Nakasuji, and Yasushi Morita

#### **General Information.**

EDT-TTF-Im was prepared in our laboratory.<sup>S1</sup> H<sub>2</sub>CNA•6H<sub>2</sub>O was prepared according to the procedure reported in the literatures<sup>S2</sup> from 2,5-dibromo-3,6-dicyano-1,4-benzoquinone which is readily accessible by our improved method.<sup>S3</sup> Infra-red (IR) spectra were measured using a Perkin-Elmer Paragon 1000 FT-IR spectrometer in KBr pellets (resolution of 4 cm<sup>-1</sup>). Electronic spectra were measured on a Shimadzu UV-3100 spectrometer in KBr pellets. Elemental analyses were performed at the Center for Organic Elemental Microanalysis, Kyoto University.

X-ray crystallographic measurements were made on a MacScience DIP-2020K oscillator type X-ray imaging plate for **1** or on a Rigaku Raxis-Rapid imaging plate for **2** with graphite monochromated Mo K $\alpha$  radiation ( $\lambda = 0.71073$  Å). Structures were determined by a direct method using SHELXS-97.<sup>S4</sup> Least-squares refinement was performed on  $F^2$  with SHELXL-97.<sup>S5</sup> All non-hydrogen atoms were refined anisotropically. Hydrogen atoms were refined using the riding model. An empirical absorption correction was applied.

[S1] T. Murata, Y. Morita, Y. Yakiyama, Y. Nishimura, T. Ise, D. Shiomi, K. Sato, T. Takui and K. Nakasuji, *Chem. Commun.*, **2007**, 4009.

[S2] (a) K. Wallenfels, G. Bachmann, D. Hofmann and R. Kern, *Tetrahedron*, 1965, **21**, 2239; (b) E. K. Andersen and I. G. K. Andersen, *Acta Crystallogr., Sect. B*, 1975, **31**, 379.

[S3] Md. B. Zaman, Y. Morita, J. Toyoda, H. Yamochi, S. Sekizaki and K. Nakasuji, *Mol. Cryst. Liq. Cryst.*, 1996, **287**, 249.

[S4] G. M. Sheldrick, *Program for the Solution of Crystal Structures*, University of Göttingen, Göttingen, Germany, 1997.

[S5] G. M. Sheldrick, *Program for the Refinement of Crystal Structures*, University of Göttingen, Göttingen, Germany, 1997.

### Procedure for preparation

#### **(EDT-TTF-Im·H<sup>+</sup>)<sub>2</sub>(ClA<sup>2-</sup>) (1)**

EDT-TTF-Im (21.0 mg, 6.4 μmol) and H<sub>2</sub>ClA (13.8 mg, 6.4 μmol) were placed at the bottom of each side of an H-shaped tube. Diffusion of them in MeCN (60 mL) at room temperature for 2 months afforded dark red crystals (21.6 mg) suitable for X-ray analysis.

mp. 239–241 °C (dec.); IR (KBr) 3150–2500, 1624, 1465 cm<sup>-1</sup>; UV (KBr) 318, 462 nm; Anal. Calcd for C<sub>28</sub>H<sub>18</sub>Cl<sub>2</sub>N<sub>4</sub>S<sub>12</sub>: C, 36.16; H, 1.95; Cl, 7.62; N, 6.02; O, 6.88; S, 41.37%. Found: C, 36.38; H, 2.11; Cl, 7.39; N, 6.32; O, 6.68; S, 41.13%.

#### **(EDT-TTF-Im·H<sup>+</sup>)<sub>2</sub>(CNA<sup>2-</sup>) (2)**

EDT-TTF-Im (3.6 mg, 1.1 μmol) and H<sub>2</sub>CNA·6H<sub>2</sub>O (3.2 mg, 0.9 μmol) were placed at the bottom of each side of an H-shaped tube. Diffusion of them in MeCN (10 mL) at room temperature for 2 months afforded dark red crystals (1.7 mg) suitable for X-ray analysis. Due to too small amount of the sample, elemental analysis could not be performed.

IR (KBr) 3150–2500, 2196, 1625, 1517 cm<sup>-1</sup>; UV (KBr) 278, 312, 444, 830 nm.

**Table S1.** Selected intramolecular bond lengths of EDT-TTF-Im.

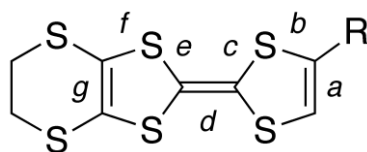

|                                               | <i>a</i> /Å | <i>b</i> /Å          | <i>c</i> /Å          | <i>d</i> /Å | <i>e</i> /Å          | <i>f</i> /Å          | <i>g</i> /Å |
|-----------------------------------------------|-------------|----------------------|----------------------|-------------|----------------------|----------------------|-------------|
| EDT-TTF-Im <sup>S1)</sup>                     | 1.338(3)    | 1.767(2)<br>1.731(2) | 1.765(2)<br>1.764(2) | 1.347(3)    | 1.751(2)<br>1.763(2) | 1.767(2)<br>1.765(2) | 1.341(3)    |
| EDT-TTF-Im-F <sub>4</sub> TCNQ <sup>S1)</sup> | 1.349(5)    | 1.739(3)<br>1.724(4) | 1.718(3)<br>1.721(3) | 1.405(5)    | 1.708(3)<br>1.715(3) | 1.729(4)<br>1.724(3) | 1.359(5)    |
| <b>1</b>                                      | 1.340(4)    | 1.751(3)<br>1.733(3) | 1.755(3)<br>1.757(3) | 1.344(4)    | 1.758(3)<br>1.754(3) | 1.755(3)<br>1.752(3) | 1.343(4)    |
| <b>2</b>                                      | 1.353(3)    | 1.755(2)<br>1.732(2) | 1.761(2)<br>1.762(2) | 1.351(3)    | 1.754(2)<br>1.756(2) | 1.758(2)<br>1.766(2) | 1.352(3)    |

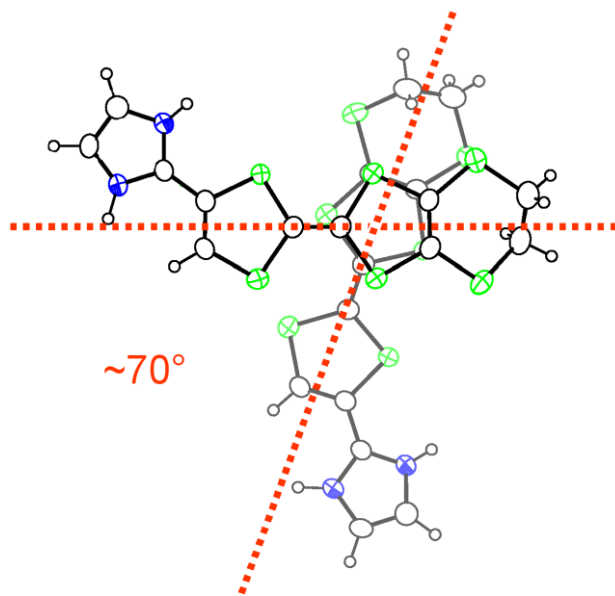

**Figure S1.** Overlap pattern of the interlayer stack in the crystal structure of **1**. Orange dotted lines indicate the twist angle of EDT-TTF-Im•H<sup>+</sup> molecules.

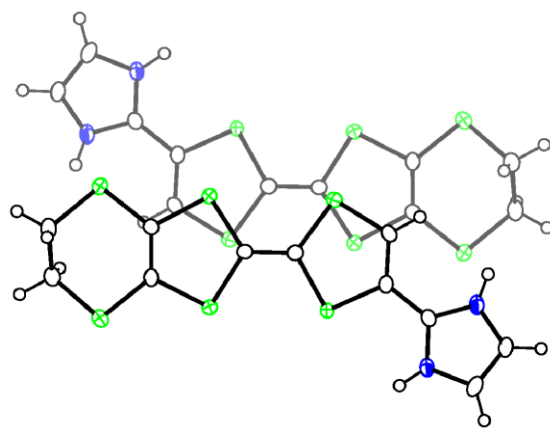

**Figure S2.** Overlap pattern of the interlayer stack in the crystal structure of **2**.

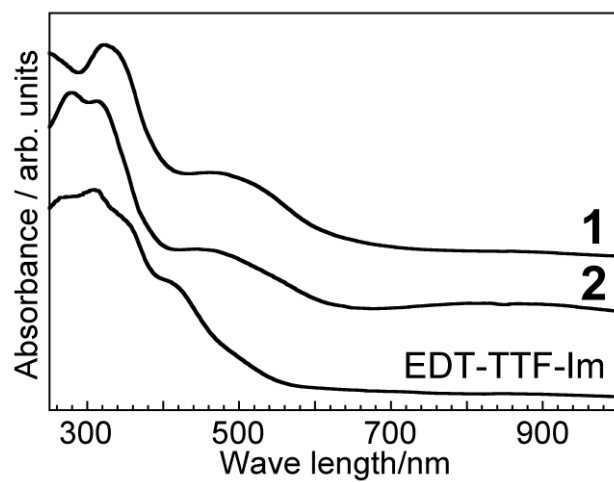

**Figure S3.** Electronic spectra of **1** and **2** in KBr pellets.
